# Supplementary material for: Highly efficient solution-processed white organic light-emitting diodes based on a co-host system by controlling energy transfer among different emitters
Source: Royal Society of Chemistry journal article supplement (doi:10.1039/d2tc00188h), 2022-01-01
Supplement: d2tc00188h1.pdf [file d2tc00188h1.pdf]

Table S1 Key performances of green OLED with various concentrations of emitter.

| Device | $V_{\text{turn-on}}$<br>(V) | $B^a$<br>( $\text{cd m}^{-2}$ ) | $\eta_c^b$ (EQE <sup>c</sup> )<br>( $\text{cd A}^{-1}$ ) | $\eta_p^d$<br>( $\text{lm W}^{-1}$ ) | $\eta_c^e$ ( $\text{cd A}^{-1}$ ) (EQE <sup>f</sup> )<br>( $1000 \text{ cd m}^{-2}$ ) | $\text{CIE}_{x,y}^g$ |
|--------|-----------------------------|---------------------------------|----------------------------------------------------------|--------------------------------------|---------------------------------------------------------------------------------------|----------------------|
| 6 wt%  | 2.8                         | 21723                           | 39.48 (11.8%)                                            | 29.33                                | 38.82 (11.6%)                                                                         | (0.29, 0.62)         |
| 8 wt%  | 3.0                         | 20886                           | 40.42 (11.9%)                                            | 34.74                                | 38.06 (11.2%)                                                                         | (0.30, 0.62)         |
| 10 wt% | 2.9                         | 21136                           | 41.07 (12.1%)                                            | 35.70                                | 38.93 (11.5%)                                                                         | (0.29, 0.60)         |
| 12 wt% | 3.0                         | 24782                           | 44.30 (13.0%)                                            | 39.18                                | 42.08 (12.3%)                                                                         | (0.30, 0.62)         |
| 14 wt% | 3.0                         | 24511                           | 42.99 (12.6%)                                            | 40.71                                | 40.98 (12.0%)                                                                         | (0.30, 0.62)         |
| 16 wt% | 2.9                         | 23700                           | 40.66 (11.9%)                                            | 37.00                                | 37.90 (11.1%)                                                                         | (0.30, 0.62)         |

<sup>a</sup> The data for maximum brightness (B), <sup>b</sup> maximum current efficiency ( $\eta_c$ ), <sup>c</sup> maximum external quantum efficiency (EQE), <sup>d</sup> maximum power efficiency ( $\eta_p$ ), <sup>e</sup> current efficiency ( $\eta_c$ ) at the practical brightness of  $1000 \text{ cd m}^{-2}$ , <sup>f</sup> external quantum efficiency (EQE) at the practical brightness of  $1000 \text{ cd m}^{-2}$ , <sup>g</sup> Commission Internationale de l'Eclairage coordinates ( $\text{CIE}_{x,y}$ ) at  $10 \text{ mA cm}^{-2}$ .

Table S2 Key performances of red OLED with various concentrations of emitter.

| Device | $V_{\text{turn-on}}$<br>(V) | $B^a$<br>( $\text{cd m}^{-2}$ ) | $\eta_c^b$ (EQE <sup>c</sup> )<br>( $\text{cd A}^{-1}$ ) | $\eta_p^d$<br>( $\text{lm W}^{-1}$ ) | $\eta_c^e$ ( $\text{cd A}^{-1}$ ) (EQE <sup>f</sup> )<br>( $1000 \text{ cd m}^{-2}$ ) | $\text{CIE}_{x,y}^g$ |
|--------|-----------------------------|---------------------------------|----------------------------------------------------------|--------------------------------------|---------------------------------------------------------------------------------------|----------------------|
| 2 wt%  | 3.4                         | 2331                            | 18.01 (10.3%)                                            | 14.58                                | 9.21 (5.2%)                                                                           | (0.57, 0.38)         |
| 3 wt%  | 3.4                         | 4435                            | 18.45 (10.0%)                                            | 14.33                                | 14.68 (7.9%)                                                                          | (0.59, 0.39)         |
| 4 wt%  | 3.4                         | 4709                            | 18.37 (10.0%)                                            | 13.14                                | 15.36 (8.4%)                                                                          | (0.59, 0.40)         |
| 5 wt%  | 3.3                         | 6653                            | 18.51 (10.2%)                                            | 15.80                                | 16.82 (9.3%)                                                                          | (0.60, 0.40)         |
| 6 wt%  | 3.5                         | 5801                            | 15.48 (8.8%)                                             | 11.53                                | 13.83 (7.8%)                                                                          | (0.60, 0.39)         |
| 8 wt%  | 3.7                         | 7279                            | 14.99 (8.8%)                                             | 9.33                                 | 13.77 (8.1%)                                                                          | (0.62, 0.40)         |

<sup>a</sup> The data for maximum brightness (B), <sup>b</sup> maximum current efficiency ( $\eta_c$ ), <sup>c</sup> maximum external quantum efficiency (EQE), <sup>d</sup> maximum power efficiency ( $\eta_p$ ), <sup>e</sup> current efficiency ( $\eta_c$ ) at the practical brightness of  $1000 \text{ cd m}^{-2}$ , <sup>f</sup> external quantum efficiency (EQE) at the practical brightness of  $1000 \text{ cd m}^{-2}$ , <sup>g</sup> Commission Internationale de l'Eclairage coordinates ( $\text{CIE}_{x,y}$ ) at  $10 \text{ mA cm}^{-2}$ .

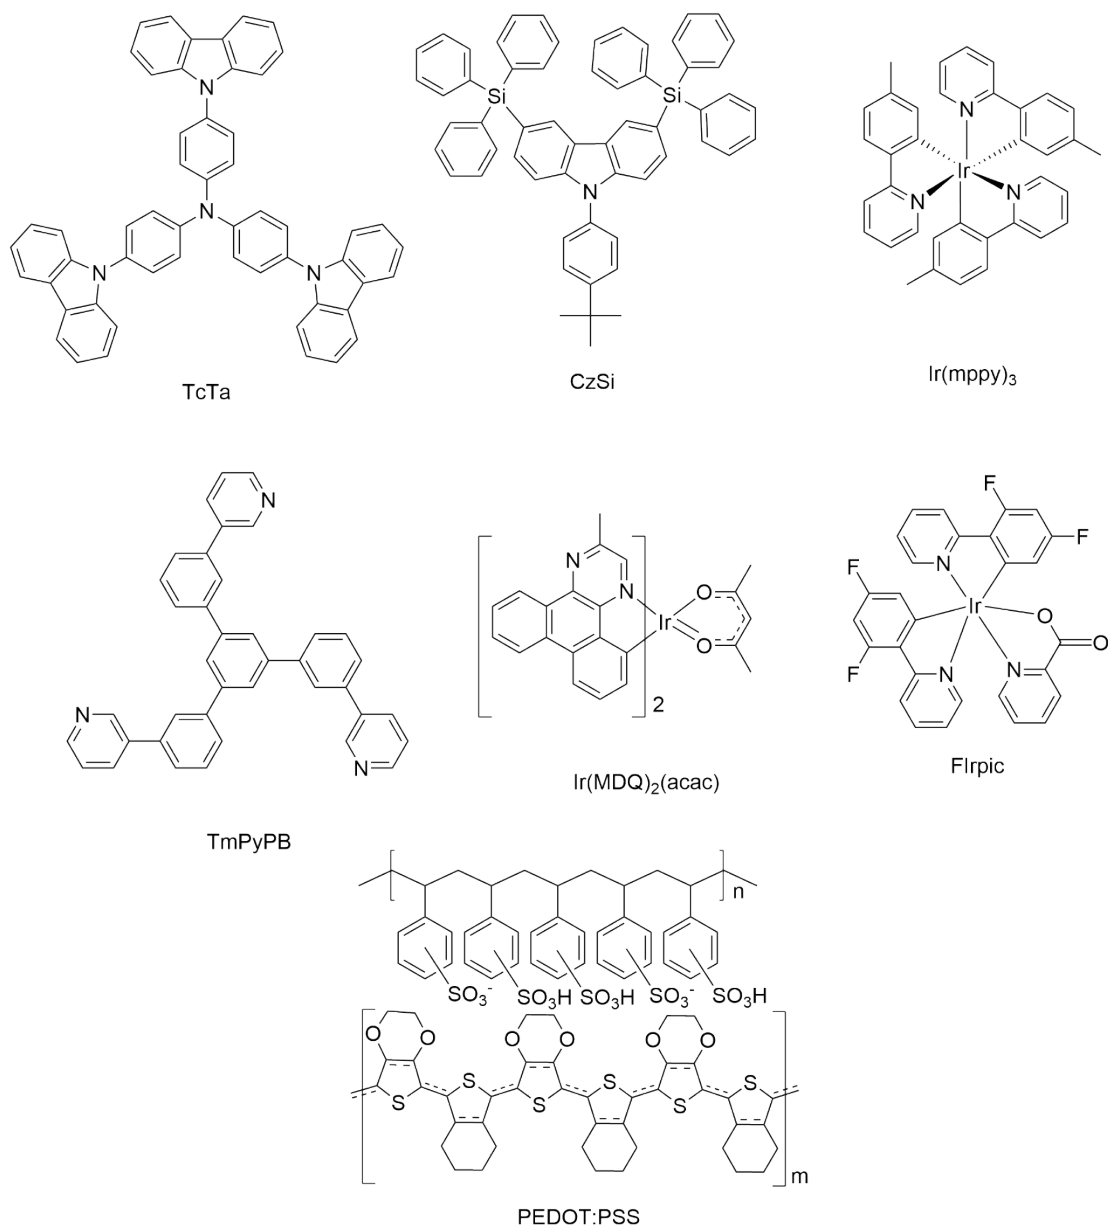

**Figure S1:** The structure of materials used this work.
